# Supplementary material
Source: PubMed Central journal article supplement (PMC8281897)
Supplement: NIHMS1605211-supplement-Supporting_Information.pdf [file NIHMS1605211-supplement-Supporting_Information.pdf]

## Supporting Information for

### ***S*-nitrosothiol-modified hyperbranched polyesters**

Lei Yang, Yuan Lu, Robert J. Soto, Anand Shah, Mona Jasmine R. Ahonen, and Mark H. Schoenfisch\*

\* Department of Chemistry, University of North Carolina – Chapel Hill, Chapel Hill, NC 27599; Email: [schoenfisch@unc.edu](mailto:schoenfisch@unc.edu)

### **Supporting Information**

Table S1. Hydrodynamic size of hyperbranched polyesters modified with DTT suspensions.

Fig. S1 Quantitative  $^{13}\text{C}$ -NMR spectra of hyperbranched polyesters.

Fig. S2 UV-vis spectra of *S*-nitrosothiol-modified hyperbranched polyesters, G2-HP-AC exposed to the nitrosation reaction conditions, and G2-HP-AC.

Fig. S3  $^1\text{H}$  NMR spectra of HP-G3-DTT and HP-G4-DTT.

Fig. S4 GPC chromatograms of hyperbranched polyesters modified with DTT.

Fig. S5 FTIR spectra for G3-HP-DTT, G3-HP-DTT/NO, G3-HP-AC exposed to the nitrosation reaction conditions, and G3-HP-AC.

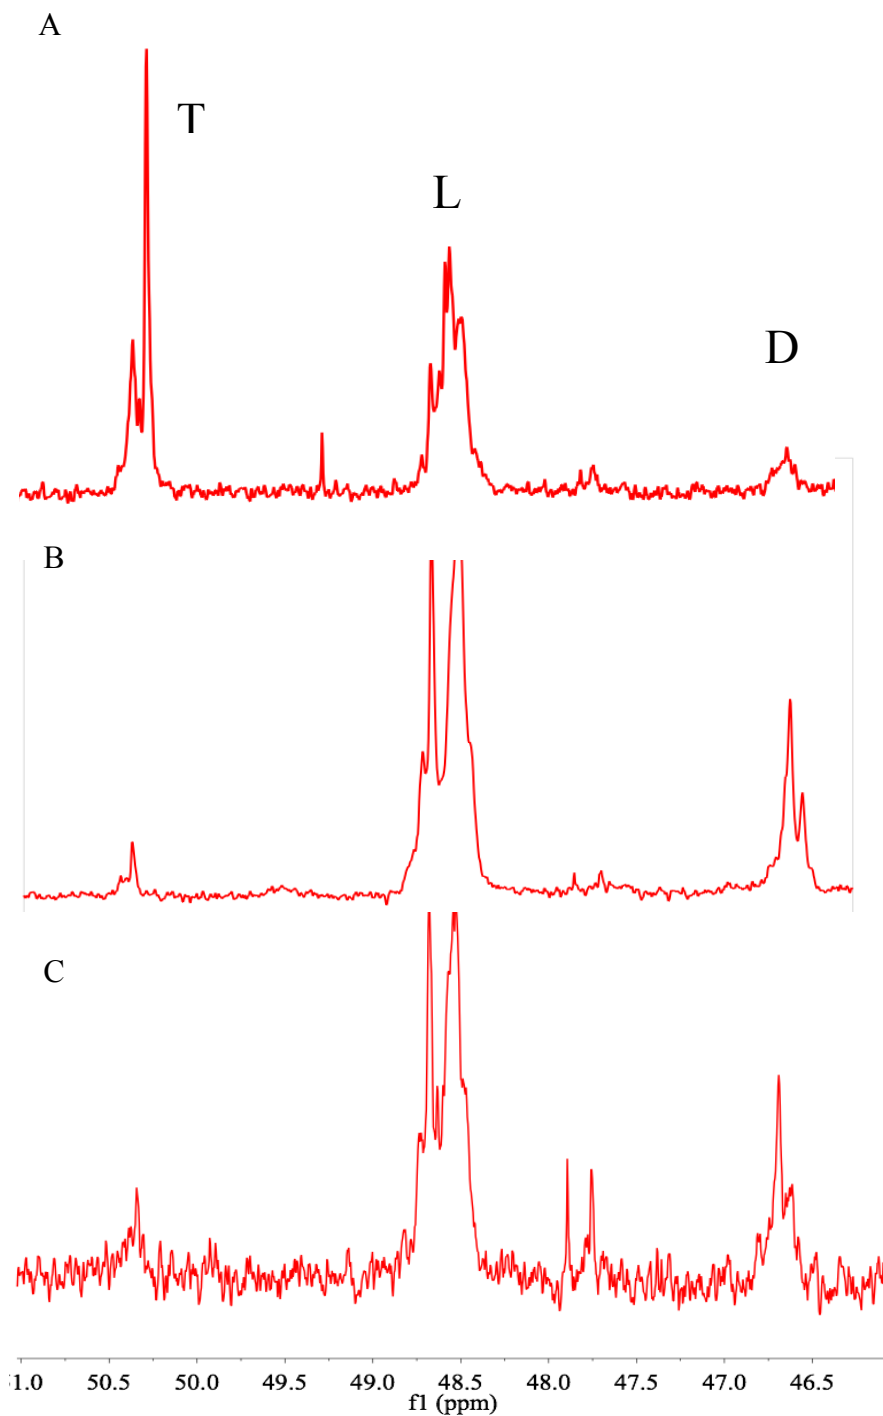

**Fig. S1** Quantitative  $^{13}\text{C}$ -NMR spectra of hyperbranched polyesters: (A) G2-, (B) G3-, and (C) G4-HP.

Degree of branching (DB) was determined by the integration of distinct peaks in  $^{13}\text{C}$  NMR spectrum at 50.6 (T), 48.8 (L), and 46.8 (D) ppm, respectively, using equation S1.

$$DB = \frac{\Sigma D + \Sigma T}{\Sigma D + \Sigma T + \Sigma L}$$

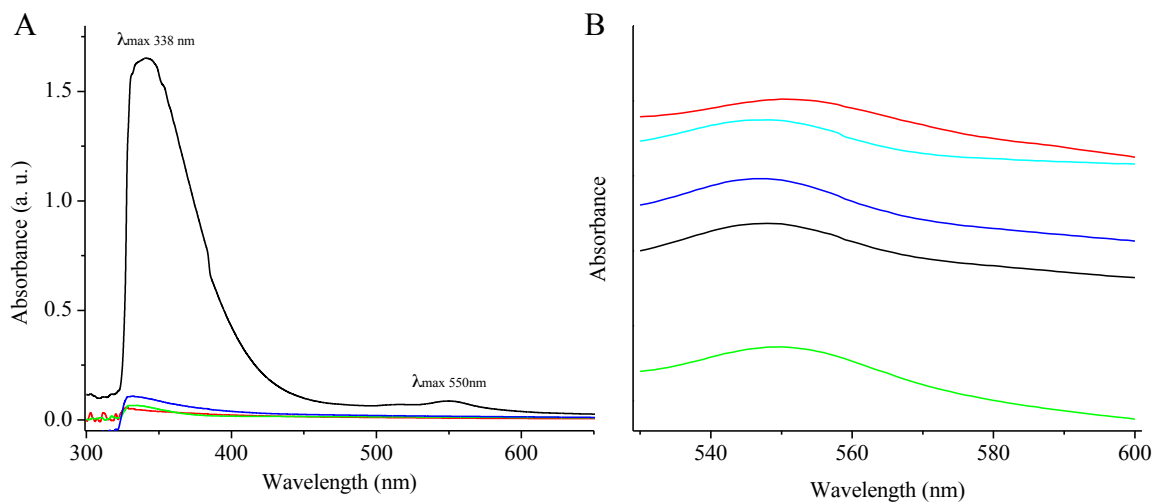

**Fig. S2** UV-vis spectra of *S*-nitrosothiol-modified hyperbranched polyesters measured in acetone ( $0.1 \text{ mg mL}^{-1}$ ): A) G2-HP-DTT/NO (black), G2-HP-DTT (red), G2-HP-AC exposed to the nitrosation reaction conditions (green), and G2-HP-AC (blue), and B) characteristic *S*-nitrosothiol bands for G2-HP-ET/NO (black), G2-HP-BT/NO (red), G2-HP-DTT/NO (green), G3-HP-DTT/NO (blue), and G4-HP-DTT/NO (cyan).

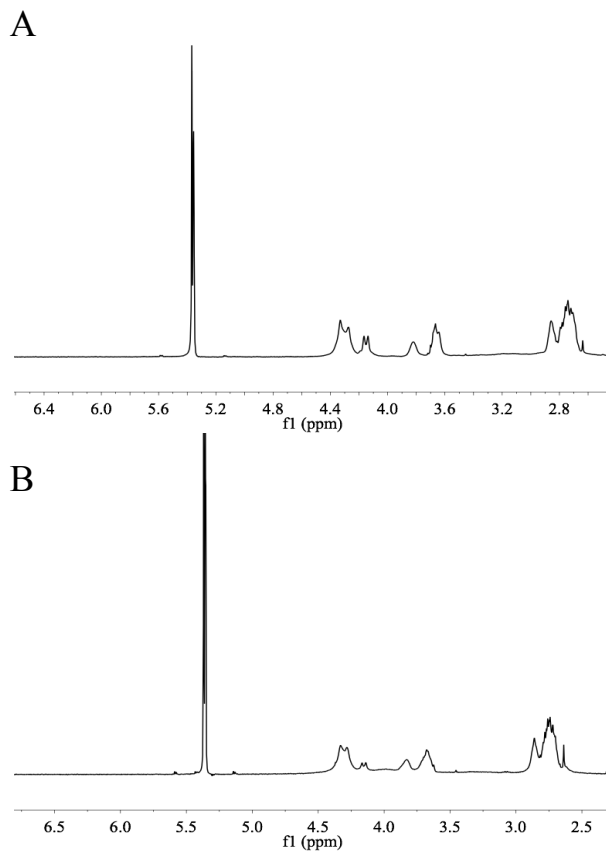

**Fig. S3**  $^1\text{H}$  NMR spectra of A) G3-HP-DTT and B) G4-HP-DTT.

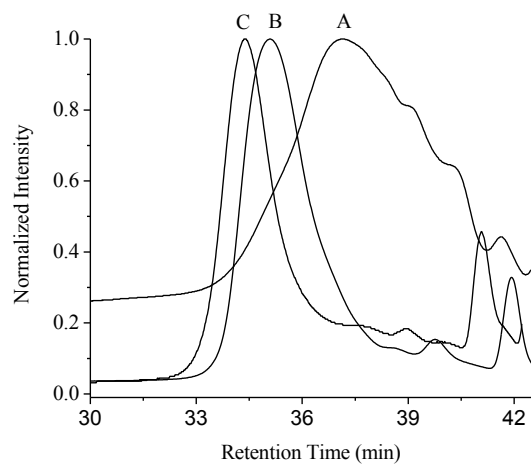

**Fig. S4** GPC chromatograms of hyperbranched polyesters modified with DTT: A) G2-, B) G3-, and C) G4-HP-DTT.

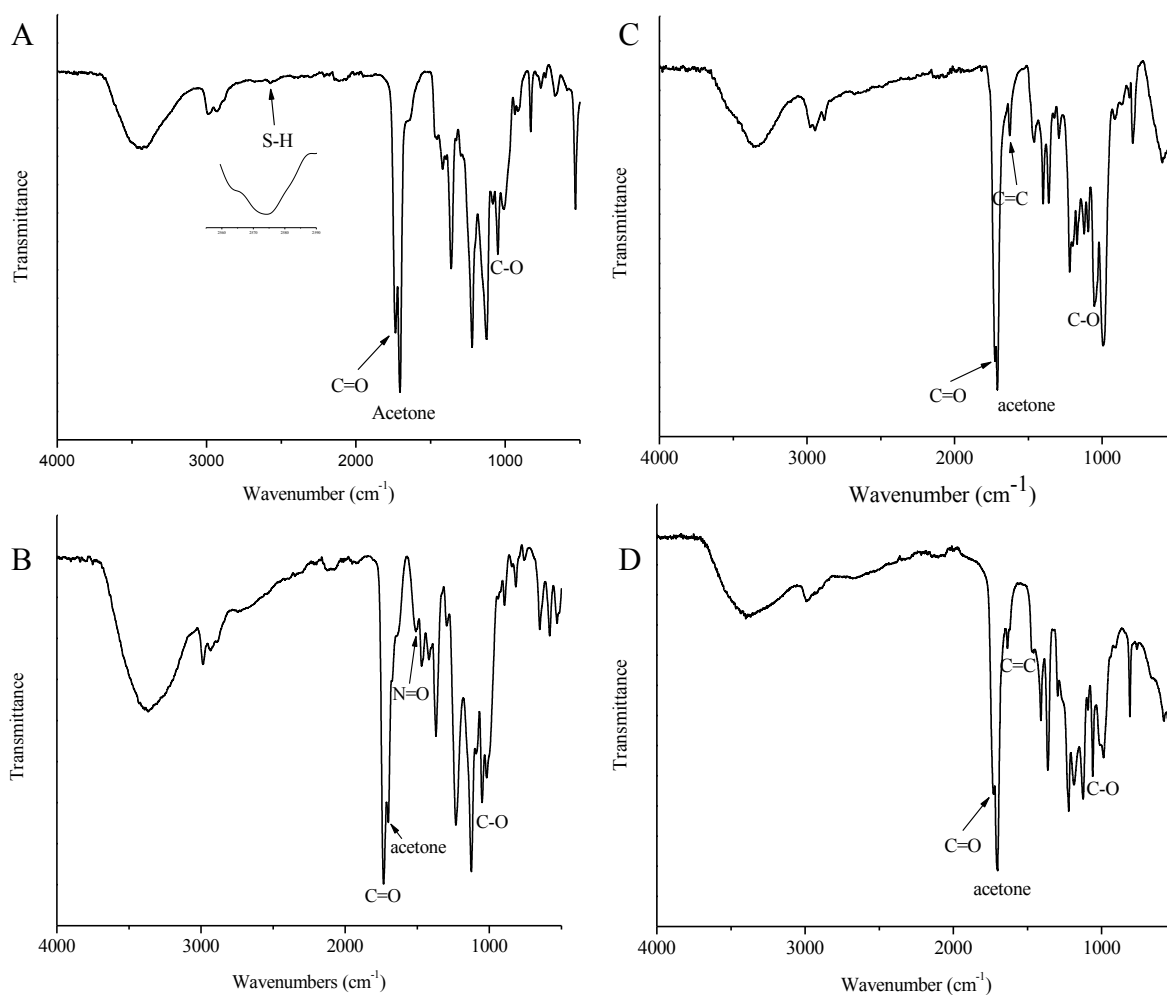

**Fig. S5** FTIR spectra for: A) G3-HP-DTT, B) G3-HP-DTT/NO, C) G3-HP-AC, and D) G3-HP-AC exposed to the nitrosation reaction conditions. A droplet of highly concentrated polyesters acetone solution was added onto the ATR-FTIR stage, and the spectra were collected via ATR mode.

**Table S1** Hydrodynamic size of hyperbranched polyesters modified with DTT suspensions.<sup>a</sup>

| Polyesters   | Hydrodynamic size (nm) <sup>b</sup> | PDI         |
|--------------|-------------------------------------|-------------|
| G2-HP-DTT/NO | 1170 ± 160                          | 0.12 ± 0.07 |
| G3-HP-DTT/NO | 1050 ± 180                          | 0.10 ± 0.07 |
| G4-HP-DTT/NO | 987 ± 150                           | 0.09 ± 0.06 |

<sup>a</sup> n ≥ 3 separate syntheses. <sup>b</sup> As determined by Dynamic Light Scattering. The concentration of NO-releasing scaffold in PBS solution for DLS measurement was the same with for NO analyzer measurement (0.33 mg mL<sup>-1</sup>).
